# Supplementary material
Source: publisher site journal article supplement (https://www.dovepress.com/article/484167)
Supplement: Supplementary file 1 [file get_supplementary_file.php]

**Supplementary Table S1. Primer sequences for quantitative real-time PCR study**

| **Gene** | **Accession No.** | **Primer Sequences (5'-3')** | **Amplification length (bp)** |
| --- | --- | --- | --- |
| *Arc* | NM_001276684.1 | FP: 5′- TGCCGAGCTGAGATGCTGGA-3′ | 104 |
| RP: 5′- ACCGACCTGTGCAACCCTTTC-3′ |
| *Calm4* | NM_001355703.1 | FP: 5′- TGCAGGACATGATCAATGAA-3′ | 102 |
| RP: 5′-CACTGTCTGTGTCTTTCATTT-3′ |
| *Drd1* | NM_001291801.1 | FP: 5′- CCTGTTTTCTGTCCCTGCTTA-3′ | 127 |
| RP: 5′-GACACAGCTAAAGAGATGACAAAGA-3′ |
| *Drd2* | NM_010077.3 | FP: 5′- ACCACTCAAGGGCAACTGTA-3′ | 100 |
| RP: 5′-ATCCATTCTCCGCCTGTTCA-3′ |
| *Htr2c* | NM_001411391.1 | FP: 5′- CCTGGCAATCCTTTATGATTATGTC-3′ | 159 |
| RP: 5′-TCGTCCCTCAGTCCAATCAC-3′ |
| *Mapk13* | NM_011950.2 | FP: 5′- GGCGGCCAAATCCTACAT-3′ | 212 |
| RP: 5′-AAGGCTGCTGGGCCTCTGTCTCC-3′ |
| *Oprm1* | NM_001302794.1 | FP: 5′- ACTGCTCCATTGCCCTAACT-3′ | 163 |
| RP: 5′-TAGCCAGAGAGGAATGACTTTG-3′ |  |
| *Slc6a3* | NM_010020.3 | FP: 5′- TCACCAACGGTGGCATCTAC-3′ | 88 |
| RP: 5′-ATGGCTTCAATGAGCACTCC-3′ |
| *Syt4* | NM_009308.3 | FP: 5′- TGTATTTCTGAACCACTTGTCC-3′ | 180 |
| RP: 5′-CTCCATGTTATTCTCAGACTGC-3′ |
| *GAPDH* | NM_001411844.1 | FP: 5′- ATCAACGGGAAGCCCATCAC-3′ | 87 |
| RP: 5′-CTCCACGACATACTCAGCACC-3′ |
